# Supplementary material
Source: PubMed Central journal article supplement (PMC3114096)
Supplement: NIHMS293522-supplement-1_si_001.pdf [file NIHMS293522-supplement-1_si_001.pdf]

Supporting Information:

# Self-assembly and mineralization of genetically modifiable biological nanofibers driven by beta-structure formation

Hong Xu<sup>1†</sup>, Binrui Cao<sup>1†</sup>, Anne George<sup>2</sup>, Chuanbin Mao<sup>1\*</sup>

<sup>†</sup>: These authors contributed equally to this work.

<sup>1</sup>: Department of Chemistry and Biochemistry, Stephenson Life Sciences Research Center, 101 Stephenson Parkway, Norman, Oklahoma 73019-5251, USA, E-mail: cbmao@ou.edu

<sup>2</sup>: Department of Oral Biology, University of Illinois, Chicago, Illinois 60612, USA,

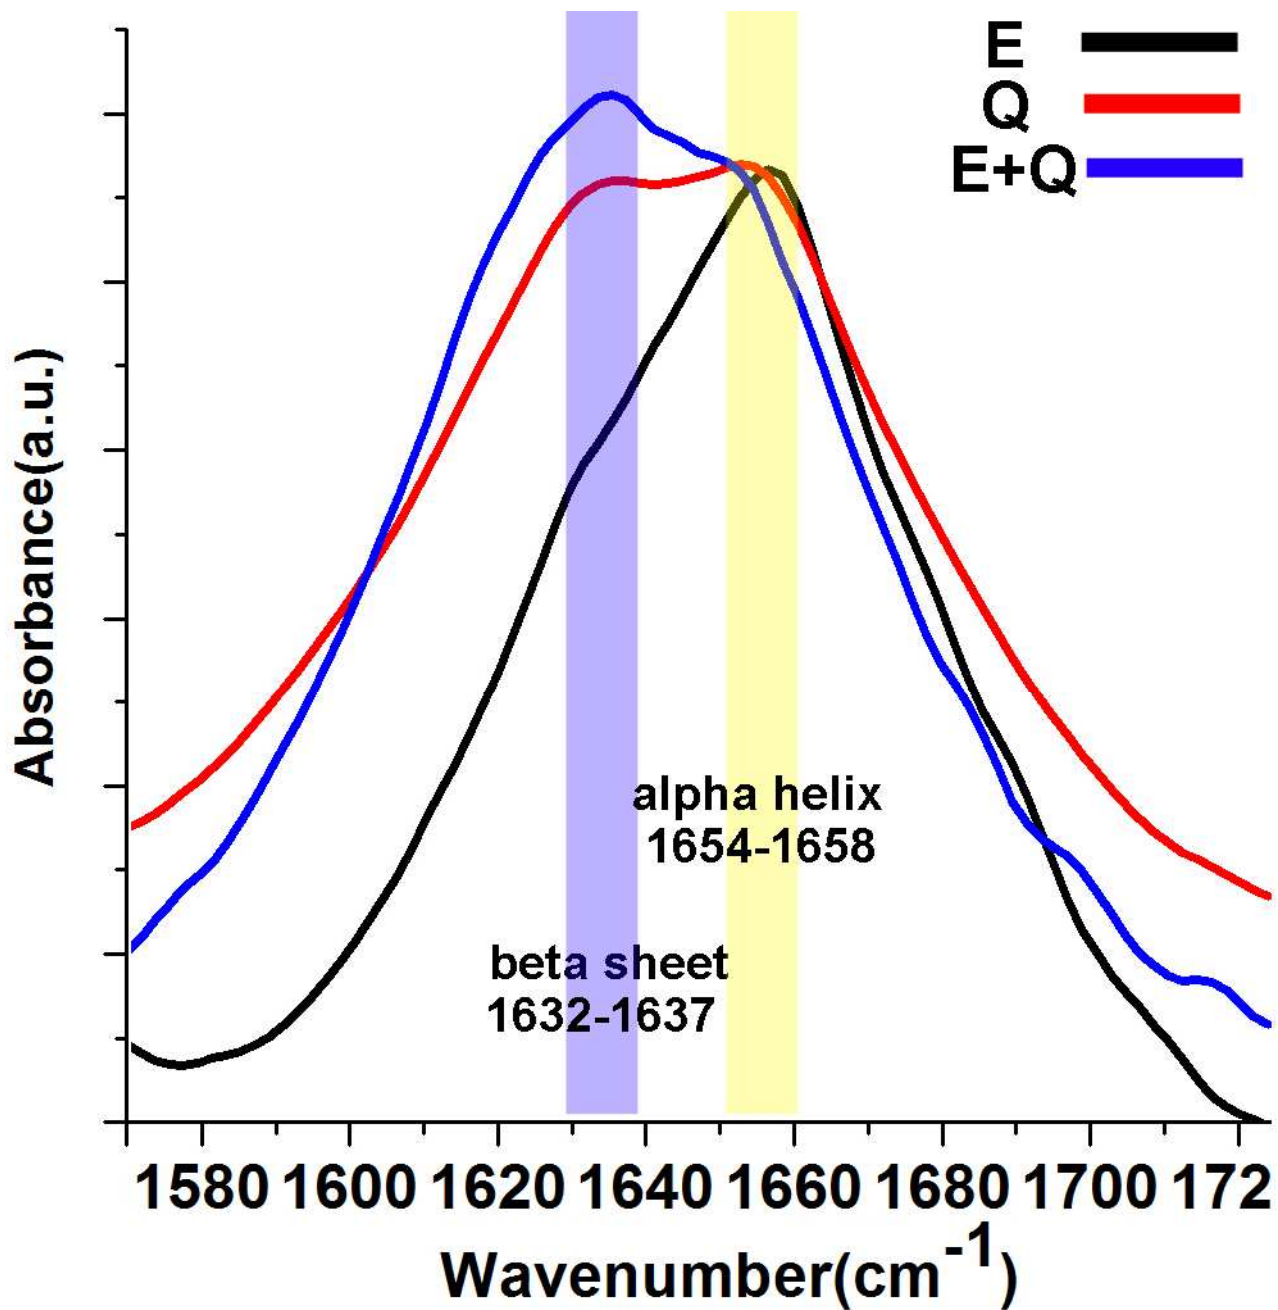

Figure S1: FT-IR spectra of phage E, Q, and E+Q. The spectrum of E phage shows essentially a band corresponding to alpha helix with a maxima around 1655  $\text{cm}^{-1}$ . However, the spectrum of Q phage shows an obvious shoulder band corresponding to beta sheet with a maxima around 1634  $\text{cm}^{-1}$ . This shoulder band is further increased for E+Q phage, suggesting that E+Q phage contains most beta sheet structure content.

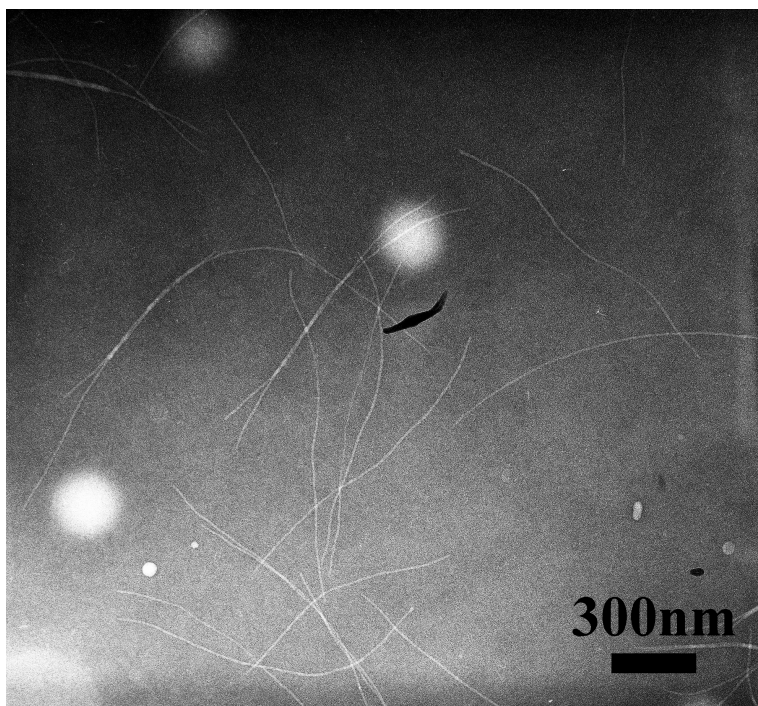

Figure S2: The result of the nucleation test on wild-type phages. The sample was negatively stained with 1% PTA. Without staining, the wild-type phages are not visible because no minerals are formed on the surface of phages. In this control experiment, 20  $\mu\text{l}$  of 0.2 mg/ml wild type phage suspension was mixed with 1ml supersaturated HAP solution in vials. Therefore, the final concentrations of wild type M13 phage and calcium ions are about  $1.43 \times 10^{11}$  pfu/ml and 4mM, respectively. [Note: In our earlier work, we reported that M13 phage particles could form bundle structures in the presence of very high concentration of calcium ions and the phage- $\text{Ca}^{2+}$  bundle composites could induce the formation of amorphous HAP minerals on them. The experimental conditions and procedures used in that work are totally different from those in this work. In that work, we used a higher concentration ( $2 \times 10^{11}$  pfu/ml) of wild type M13 phage particles, which were soaked into the solution with a very high concentration of calcium ions (200 mM, which is much higher than 4 mM used in this study). (Wang, F. K.; Cao, B. R.; Mao, C. B., Bacteriophage Bundles with Prealigned  $\text{Ca}^{2+}$  Initiate the Oriented Nucleation and Growth of Hydroxylapatite. *Chem Mater* **2010**, 22 (12), 3630-3636.)]
